# Supplementary material for: A Comparative Study between Screen-Printed and Solid-Contact Electrodes for the Stability-Indicating Determination of Bromazepam
Source: MDPI journal article supplement (doi:10.3390/molecules27217616), 2022-11-06
Supplement: s1 [file s1]

### Supplementary data:

**Table S1.** Original data for the calibration graphs for the BRZ electrodes using DOP as plasticizer at 25 °C.

| -log C | E (mV) SPE | E (mV) SCE |
|--------|------------|------------|
| 8      | 79.00      | 46.00      |
| 7      | 80.00      | 47.00      |
| 6      | 87.40      | 50.00      |
| 5      | 138.10     | 100.00     |
| 4      | 188.20     | 150.00     |
| 3      | 239.30     | 200.10     |
| 2      | 290.00     | 250.00     |

**Table S2.** Original data for the calibration graphs for the BRZ electrodes using DBS as plasticizer at 25 °C.

| -log C | E (mV) SPE | E (mV) SCE |
|--------|------------|------------|
| 8      | 69.00      | 37.40      |
| 7      | 70.00      | 38.50      |
| 6      | 74.00      | 41.60      |
| 5      | 125.70     | 91.70      |
| 4      | 177.70     | 142.00     |
| 3      | 229.20     | 192.50     |
| 2      | 281.00     | 243.00     |

**Table S3.** pH effect on the potential using two concentration levels of BRZ standard solutions.

| pH   | 10 <sup>-3</sup> M |               | 10 <sup>-4</sup> M |               |
|------|--------------------|---------------|--------------------|---------------|
|      | SPE                | SCE           | SPE                | SCE           |
|      | E (mV) ± SD *      | E (mV) ± SD * | E (mV) ± SD *      | E (mV) ± SD * |
| 1.0  | 235.00 ± 0.85      | 194.00 ± 0.64 | 184.00 ± 1.16      | 150.00 ± 0.52 |
| 2.0  | 241.00 ± 0.63      | 200.00 ± 0.53 | 186.00 ± 0.81      | 151.00 ± 0.45 |
| 3.0  | 250.30 ± 0.76      | 211.90 ± 0.74 | 190.60 ± 1.31      | 153.8 ± 0.34  |
| 4.0  | 250.30 ± 1.01      | 211.90 ± 0.85 | 190.60 ± 0.77      | 153.8 ± 0.41  |
| 5.0  | 250.20 ± 0.45      | 211.80 ± 0.44 | 190.60 ± 0.99      | 153.8 ± 0.79  |
| 6.0  | 250.30 ± 0.50      | 211.90 ± 0.42 | 190.50 ± 0.70      | 153.70 ± 0.53 |
| 7.0  | 240.00 ± 0.66      | 201.00 ± 0.99 | 186.00 ± 1.42      | 151.00 ± 0.81 |
| 8.0  | 235.00 ± 0.94      | 195.00 ± 1.12 | 184.00 ± 0.54      | 150.00 ± 0.46 |
| 9.0  | 230.00 ± 0.81      | 190.00 ± 0.68 | 183.00 ± 1.51      | 149.00 ± 0.63 |
| 10.0 | 225.00 ± 0.42      | 185.00 ± 1.31 | 182.00 ± 0.72      | 148.00 ± 1.12 |

\* Average of three measurements.

**Table S4.** Accuracy of the fabricated electrodes.

|         | Added<br>concentration (M) | Found<br>concentration (M) | Recovery% | Average<br>recovery% $\pm$ SD |
|---------|----------------------------|----------------------------|-----------|-------------------------------|
| BRZ-SPE | $10.00 \times 10^{-3}$     | $9.90 \times 10^{-3}$      | 99.00     | $100.07 \pm 1.06$             |
|         | $10.00 \times 10^{-4}$     | $10.01 \times 10^{-4}$     | 100.10    |                               |
|         | $10.00 \times 10^{-5}$     | $10.11 \times 10^{-4}$     | 101.10    |                               |
| BRZ-SCE | $10.00 \times 10^{-3}$     | $10.04 \times 10^{-3}$     | 100.40    | $100.42 \pm 0.93$             |
|         | $10.00 \times 10^{-4}$     | $9.95 \times 10^{-4}$      | 99.50     |                               |
|         | $10.00 \times 10^{-5}$     | $10.13 \times 10^{-5}$     | 101.30    |                               |

**Table S5.** Robustness of the fabricated electrodes upon carrying out slight pH change (pH 6.2).

|         | Added<br>concentration<br>(M) | Found<br>concentration<br>(M) | Recovery% | Average<br>recovery% $\pm$ SD |
|---------|-------------------------------|-------------------------------|-----------|-------------------------------|
| BRZ-SPE | $10.00 \times 10^{-3}$        | $10.11 \times 10^{-3}$        | 101.10    | $101.14 \pm 1.13$             |
|         | $10.00 \times 10^{-4}$        | $10.23 \times 10^{-4}$        | 102.30    |                               |
|         | $10.00 \times 10^{-5}$        | $10.00 \times 10^{-4}$        | 100.00    |                               |
| BRZ-SCE | $10.00 \times 10^{-3}$        | $10.08 \times 10^{-3}$        | 100.80    | $101.64 \pm 0.84$             |
|         | $10.00 \times 10^{-4}$        | $10.23 \times 10^{-4}$        | 102.30    |                               |
|         | $10.00 \times 10^{-5}$        | $10.16 \times 10^{-5}$        | 101.60    |                               |

**Table S6.** Ruggedness of the fabricated electrodes using Hanna digital ion analyzer.

|         | Added<br>concentration<br>(M) | Found<br>concentration<br>(M) | Recovery% | Average recovery%<br>$\pm$ SD |
|---------|-------------------------------|-------------------------------|-----------|-------------------------------|
| BRZ-SPE | $10.00 \times 10^{-3}$        | $10.08 \times 10^{-3}$        | 100.80    | $99.51 \pm 1.28$              |
|         | $10.00 \times 10^{-4}$        | $9.82 \times 10^{-4}$         | 98.20     |                               |
|         | $10.00 \times 10^{-5}$        | $9.95 \times 10^{-4}$         | 99.50     |                               |
| BRZ-SCE | $10.00 \times 10^{-3}$        | $10.01 \times 10^{-3}$        | 100.10    | $98.41 \pm 1.66$              |
|         | $10.00 \times 10^{-4}$        | $9.84 \times 10^{-4}$         | 98.40     |                               |
|         | $10.00 \times 10^{-5}$        | $9.68 \times 10^{-5}$         | 96.80     |                               |

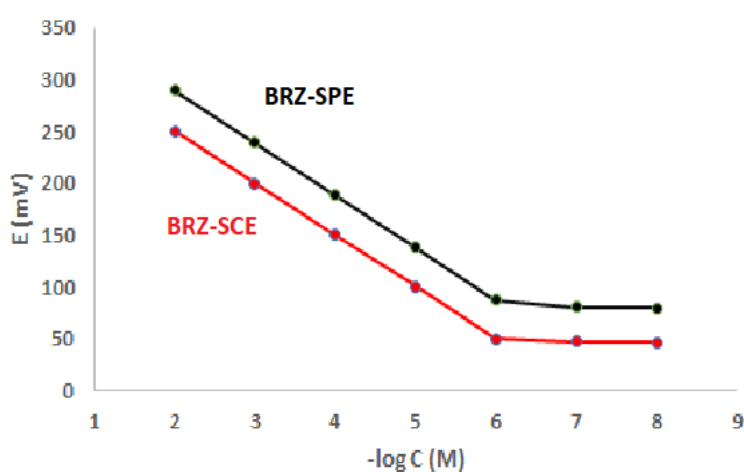**Figure S1.** Calibration graphs for the BRZ electrodes using DOP as plasticizer at 25 °C.

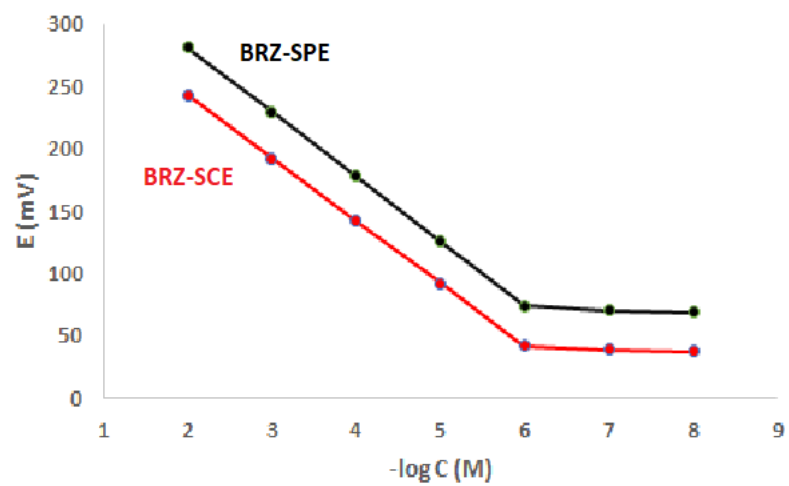

**Figure S2.** Calibration graphs for the BRZ electrodes using DBS as plasticizer at 25 °C.
